# Supplementary material
Source: Springer Nature journal article supplement (https://www.springermedizin.de/resource/supplementary/13002_2010_211_MOESM1_ESM.pdf/9627430)

Species Number

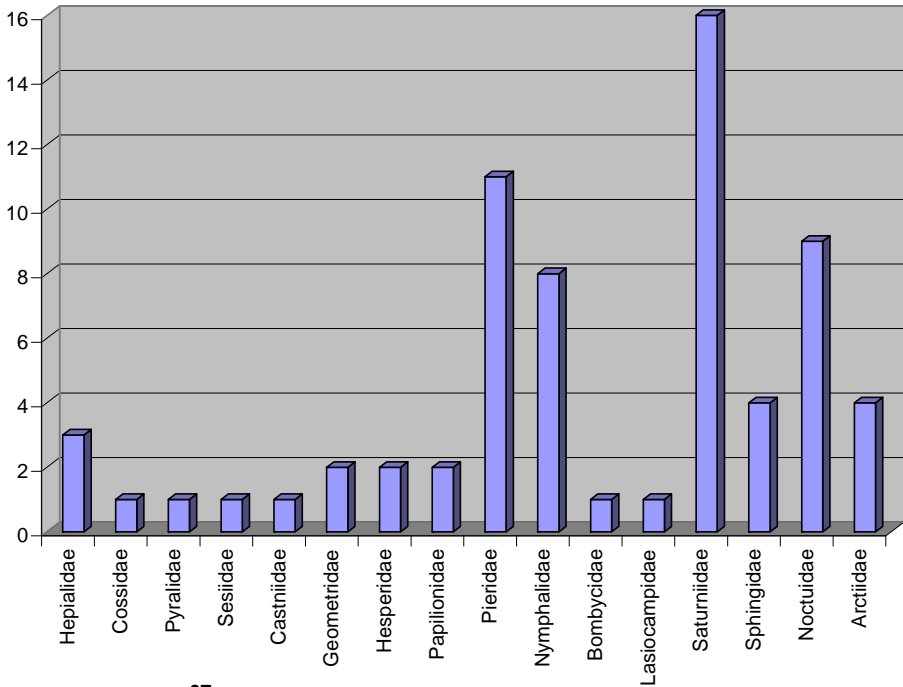

n = 67

Families

Supplement: MOESM1 [file 9627430]
